# Supplementary material for: Effect of Bacillus subtilis on antioxidant enzyme activities in tomato grafting
Source: PeerJ. 2021 Mar 12;9:e10984. doi: 10.7717/peerj.10984 (PMC7958894; doi:10.7717/peerj.10984)
Supplement: Supplemental Information 3 [file peerj-09-10984-s003.xlsx]

## Sheet: 3- Savenging activity_DPPH
Concentration of cells of Bacillus subtilis	Scavenging %
0.5 ml	29.0429
1.0 ml	37.0079
1.5 ml	66.3462
2.0 ml	81.1111
2.5 ml	100
