# Supplementary material for: Effect of Bacillus subtilis on antioxidant enzyme activities in tomato grafting
Source: PeerJ. 2021 Mar 12;9:e10984. doi: 10.7717/peerj.10984 (PMC7958894; doi:10.7717/peerj.10984)
Supplement: Supplemental Information 7 [file peerj-09-10984-s007.xlsx]

## Sheet: 6-Enzyme activity _PAL TotalPhe
Time	Combination	Inoculation	PAL (U/mg protein)	Total Phenols (mEq of gallic acid/mg of sample)
1	rg-ch	control	7.661	15.415
1	rg-ch	control	7.64	15.027
1	rg-ch	control	7.685	15.316
1	rg-ch	bacteria	0.531	6.176
1	rg-ch	bacteria	0.565	6.986
1	rg-ch	bacteria	0.564	6.986
1	rg-ber	control	4.016	23.374
1	rg-ber	control	3.731	23.357
1	rg-ber	control	3.865	23.878
1	rg-ber	bacteria	0.118	7.364
1	rg-ber	bacteria	0.095	7.333
1	rg-ber	bacteria	0.127	7.217
1	rg-pep	control	2.945	4.44
1	rg-pep	control	3.116	4.845
1	rg-pep	control	2.892	4.961
1	rg-pep	bacteria	1.317	6.581
1	rg-pep	bacteria	1.313	6.523
1	rg-pep	bacteria	1.209	6.465
15	rg-ch	control	0.305	6.176
15	rg-ch	control	0.318	6.06
15	rg-ch	control	0.313	6.002
15	rg-ch	bacteria	0.207	7.622
15	rg-ch	bacteria	0.226	7.68
15	rg-ch	bacteria	0.236	7.68
15	rg-ber	control	0.642	6.292
15	rg-ber	control	0.652	6.118
15	rg-ber	control	0.658	6.06
15	rg-ber	bacteria	0.291	4.151
15	rg-ber	bacteria	0.286	3.978
15	rg-ber	bacteria	0.317	4.035
15	rg-pep	control	2.343	8.49
15	rg-pep	control	2.25	8.606
15	rg-pep	control	2.252	8.432
15	rg-pep	bacteria	0.255	7.68
15	rg-pep	bacteria	0.272	7.738
15	rg-pep	bacteria	0.31	7.564
28	rg-ch	control	0.278	8.49
28	rg-ch	control	0.262	8.548
28	rg-ch	control	0.266	8.316
28	rg-ch	bacteria	0.18	9.968
28	rg-ch	bacteria	0.163	9.936
28	rg-ch	bacteria	0.188	9.763
28	rg-ber	control	0.878	5.308
28	rg-ber	control	0.852	5.25
28	rg-ber	control	0.868	5.424
28	rg-ber	bacteria	0.348	7.68
28	rg-ber	bacteria	0.379	7.738
28	rg-ber	bacteria	0.392	7.449
28	rg-pep	control	0.815	10.271
28	rg-pep	control	0.912	10.168
28	rg-pep	control	0.858	10.052
28	rg-pep	bacteria	7.358	8.816
28	rg-pep	bacteria	7.266	8.606
28	rg-pep	bacteria	7.327	8.837
